# Supplementary material for: Deacetylation of sialic acid by esterases potentiates pneumococcal neuraminidase activity for mucin utilization, colonization and virulence
Source: PubMed Central journal article supplement (PMC5352144; doi:10.1371/journal.ppat.1006263), 2017-03-03
Supplement: ppat.1006263.s001.pdf [file ppat.1006263.s001.pdf]

A

```

T-COFFEE, Version_11.00.8cbe486 (2014-08-12 22:05:29 - Revision 8cbe486 - Build 477)
Cedric Notredame
SCORE=823
*
BAD AVG GOOD
spd SPD 0534 : 86
llm llmg 1953 : 88
hsa 2098 : 86
eco b2154 : 87
hin HI0184 : 87
cons : 82

spd SPD 0534 ERLLRGTNLIVVMPNTS-----N
llm llmg 1953 ERLIRHTNLAIVMPSTD-----L
hsa 2098 HOSASEHGLVVIAPDTSPRGCNIKGEDESWDFGTGA
eco b2154 ORVAAELGIVLVMPDTS PRGEKVA-NDGQYDLGOGA
hin HI0184 QRYAAEHQVIVVAPDTS PRGEQVP-NDAAYDLGOGA
cons : : : * . * .

spd SPD 0534 GWYTDTOY----GFDYYTALAEELPOVLKRFFPNM
llm llmg 1953 GFYVNTTY----GMNYFDAIALELPKVIHNFPPNL
hsa 2098 GFYVDATEPDPWKTYRMYSYVTEELPOLINANFPVD
eco b2154 GFYLNATOPPWATHYRMYDYLRDL PALVOSOFNS
hin HI0184 GFYLNATEQPWATHYQMYDYLRDEL PDLIENAFNTN
cons * : * : : : : * * * : : *

spd SPD 0534 TSKREKTFIA GLSMGGYGCFLALTT-NRFSHAASF
llm llmg 1953 STKKEKNFIA GLSMGGYAYRLALGT-DHFSYAASF
hsa 2098 P----ORMSIFGHSMGGHGALICALKNPGKYKSVSAF
eco b2154 P----DRCALISGHSMGGHGALIMALKNPKYKTSVSAF
hin HI0184 P----GKRISIMGHSMGGHGALVLRNRERYQSVSAF
cons : : * * * * * : * . * . : : : :

spd SPD 0534 SGALSFONFSPESONLGSPAYWRGVFGEIRD-WTT-
llm llmg 1953 SGVLTTFD----GMEENFKEN-PAYWGGIFGNWETF
hsa 2098 APTCNPV----LCFPGKKAF-SGYLGTDOSKWKAY
eco b2154 APIVNPC----SVPWGIKAF-SSYLGEDKNWLEW
hin HI0184 SPILSPS----LVPWGEKAF-SAYLGEDREKWQY
cons : : . : : . * : *

spd SPD 0534 --SPYSLESLAK-KSDKKTKLWAWCGEOLFYE-AN
llm llmg 1953 KGSNDNEITLADRKNEERPKLYAWCGKODFLFP-GN
hsa 2098 DA---THLVKSY-PGSOLDLILIDOGKDDOFLLDGOL
eco b2154 DS---CALMYASNAODAIPTLIDOGDNDQFLAD-QL
hin HI0184 DA---SSLIQQG--YKVQGMRIDQGLEDFLPT-QL
cons : : : : : : : : : * *

spd SPD 0534 NL--AVKNLKKLGFDTVYSHSAGT--HEWYYWEKOLE
llm llmg 1953 EY--AIAELKKKGFDTVYESSDGV--HEWYYWTKKIE
hsa 2098 LPDNFIAACTEKKIPVVFRLQEGYDHSYFIIATFIT
eco b2154 OPAVLAEAAROKAWPMTLRIOPGYDHSYFIIASFIE
hin HI0184 RTEDFIETCRVANQPVDVRFHKGYDHSYFIIASFIE
cons : : : : * * . : : :

spd SPD 0534 VFLTTLPIDFKLEERLT
llm llmg 1953 SVLOWLPIINYKQERLS
hsa 2098 DHIRHHA-KYLN----A
eco b2154 DHLRFHA-OYLL----K
hin HI0184 EHIAYHA-EFL----K
cons : : : : :

```

B

```

T-COFFEE, Version_11.00.8cbe486 (2014-08-12 22:05:29 - Revision 8cbe486 - Build 477)
Cedric Notredame
SCORE=693
*
BAD AVG GOOD
spd SPD 1506 : 57
llm llmg 1953 : 72
hsa 2098 : 75
eco b2154 : 77
hin HI0184 : 77
cons : 69

spd SPD 1506 EGR-----DHLFYKD-----
llm llmg 1953 PST-----DLGFYVNTTY---GM
hsa 2098 PDTSPRGCNKGEDESWDFGTGAGFYVDATEDPWKT
eco b2154 PDTSPRGEKVA-NDGQYDLGOGAGFYLNATEQPWAT
hin HI0184 PDTSPRGEQVP-NDAAYDLGOGAGFYLNATEQPWAT
cons : : : * * :

spd SPD 1506 -----VYLDIYOLVEIVASLSOV-D--EKRLSSY
llm llmg 1953 NY--FDAIAL---ELPKVIHNFPPNLSTKKEKNFIA
hsa 2098 NYRMSYVTE---ELPOLINANFPV-D--PQRMSIF
eco b2154 HYRMYDYLRD---ELPALVOSOFNV-S--D-RCAIS
hin HI0184 NYQMYDYILN---ELPOLIEANFPT-N--G-KRSIM
cons : : * : : : :

spd SPD 1506 GASQGGALALVAALNPR-IOKTVAIYPFLLSDFRRV
llm llmg 1953 GLSMGGYAYRLALGTDH-FSAAASLSGVLTDF-GM
hsa 2098 GHSMGGHICALICALKNPGKYKSVSAFAPICNPV-LC
eco b2154 GHSMGGHICALICALKNPGKYKTSVSAFIPVNSV
hin HI0184 GHSMGGHICALVLRNRERYQSVSAFSPILSPLV
cons * * * * * : : : : :

spd SPD 1506 IETGN-TSEAY-DELFRYFKFYDPFHETEEEMATL
llm llmg 1953 EENFKENPAYWGGIFGNWETFKG--SDNEILA--
hsa 2098 -PWGKAFSSYLGTDOSKWKAYDATHL-----V-
eco b2154 -PWGKAFSSYLGEDKNWLEWDSICAL-----M-
hin HI0184 -PWGEKAFSAYLGEDREKWQYDASSL-----I-
cons : : . * . : : :

spd SPD 1506 AYIDVKNLAHRIOGEVK--MITGLDQVVCY-PITOF
llm llmg 1953 -----LADRKNEERPKLYAWCGKODFLFP-PGNEY
hsa 2098 -----KSYPGS-OLDLIDOGKDDOFLLDGOLLP
eco b2154 -----YASNAODAIPTLIDOGDNDQFLA-DQLOP
hin HI0184 -----QQGYKV-Q-GMRIDQGLEDFLPT-QLRRT
cons : : : : : : : : :

spd SPD 1506 A--I--YNRLTCDKTYRIMPEYAFHEAM--NVFVNDQ
llm llmg 1953 A--IAELKKKGFDTVYESSDGV--HEWYYWTKKIESV
hsa 2098 DNFIAACTEKKIPVVFRLQEGYDHSYFIIATFITDH
eco b2154 AVLAEAAROKAWPMTLRIOPGYDHSYFIIASFIEH
hin HI0184 EDFIETCRVANQPVDVRFHKGYDHSYFIIASFIEH
cons : : : : * . : :

spd SPD 1506 VYNWLCGSEIPFKY-----L-K
llm llmg 1953 LOWL-----PINYKQERL-S
hsa 2098 IR-----HFAKY-----LNA
eco b2154 LR-----FHAQY-----LLK
hin HI0184 IA-----YHAEF-----L-K
cons : : : : : *

```
