# Supplementary material for: Deacetylation of sialic acid by esterases potentiates pneumococcal neuraminidase activity for mucin utilization, colonization and virulence
Source: PubMed Central journal article supplement (PMC5352144; doi:10.1371/journal.ppat.1006263), 2017-03-03

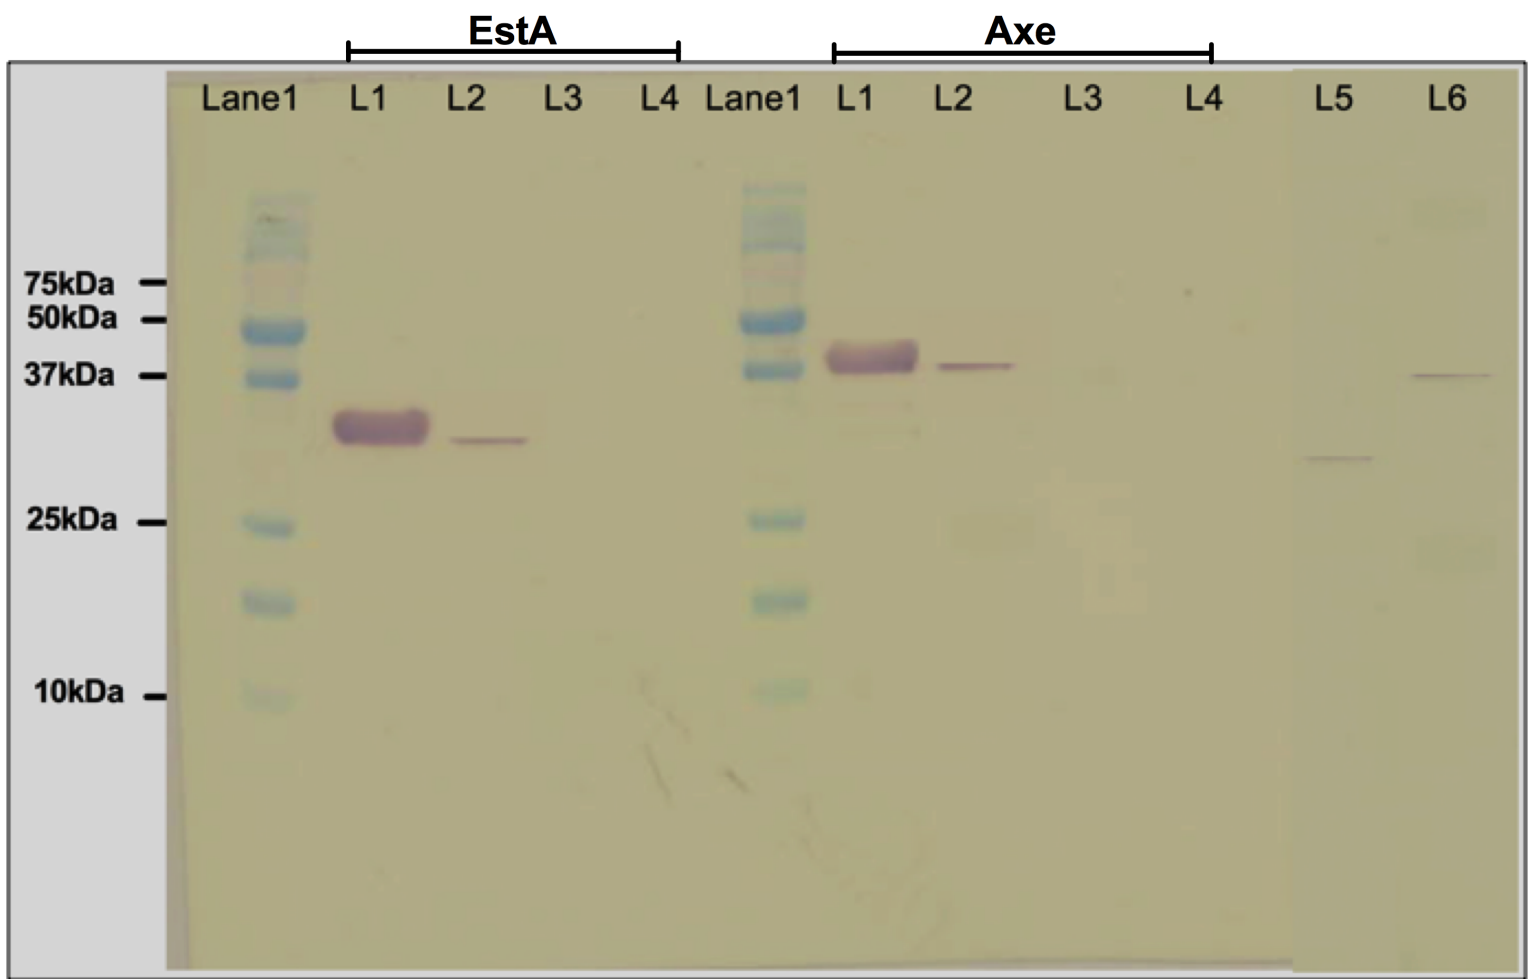

Supplement: ppat.1006263.s003.pdf [file ppat.1006263.s003.pdf]
