# Supplementary material for: Deacetylation of sialic acid by esterases potentiates pneumococcal neuraminidase activity for mucin utilization, colonization and virulence
Source: PubMed Central journal article supplement (PMC5352144; doi:10.1371/journal.ppat.1006263), 2017-03-03
Supplement: ppat.1006263.s004.pdf [file ppat.1006263.s004.pdf]

| <b>Strains</b>                       | <b>Genotype</b>                                                                                                                                                                                                                         | <b>Source</b>                                                                  |
|--------------------------------------|-----------------------------------------------------------------------------------------------------------------------------------------------------------------------------------------------------------------------------------------|--------------------------------------------------------------------------------|
| <i>E. coli</i><br>BL21 DE3           | <i>F-ompT hsdSB (rb-mb)gal dcm (DE3)</i>                                                                                                                                                                                                | Agilent Technology Ltd.,<br>UK                                                 |
| <i>E. coli</i><br>DH5 $\alpha$       | <i>F<sup>-</sup>, <math>\phi</math> 80dlacZ <math>\Delta</math>M15, <math>\Delta</math>(lacZYA -argF)U169, deoR, recA1, endA1, hsdR17 (rK<sup>-</sup>, mK<sup>+</sup>), phoA, supE44, <math>\lambda^-</math>, thi -I, gyrA96, relA1</i> | In-Fusion HD Cloning<br>Kit<br>Clontech, USA                                   |
| <i>S. pneumoniae</i><br>D39          | Virulent type 2 strain                                                                                                                                                                                                                  | The National Collection<br>of Type Cultures,<br>London, UK Strain<br>NTCC 7466 |
| $\Delta$ SPD0534<br>( $\Delta$ estA) | Tributyryl esterase, putative                                                                                                                                                                                                           | This study                                                                     |
| $\Delta$ SPD1506<br>( $\Delta$ axe)  | Acetyl xylan esterase, putative                                                                                                                                                                                                         | This study                                                                     |
| $\Delta$ SPD1239                     | Acyl-ACP-thioesterase, putative                                                                                                                                                                                                         | This study                                                                     |
| $\Delta$ SPD0932                     | Phosphoesterase, putative                                                                                                                                                                                                               | This study                                                                     |
| $\Delta$ estAnanA                    | Tributyryl esterase-neuraminidase A double mutant                                                                                                                                                                                       | This study                                                                     |
| $\Delta$ axenanA                     | Acetyl xylan esterase-neuraminidase A double mutant                                                                                                                                                                                     | This study                                                                     |
| $\Delta$ estAaxe                     | Tributyryl esterase-acetyl xylan esterase double mutant                                                                                                                                                                                 | This study                                                                     |
| $\Delta$ nanA                        | Neuraminidase A                                                                                                                                                                                                                         | This study                                                                     |
| estAComp                             | Tributyryl esterase complemented                                                                                                                                                                                                        | This study                                                                     |
| axeComp                              | Acetyl xylan esterase complemented                                                                                                                                                                                                      | This study                                                                     |
| estAComp <sup>S121A</sup>            | Tributyryl esterase modified complemented                                                                                                                                                                                               | This study                                                                     |
| axeComp <sup>S181A</sup>             | Acetyl xylan esterase modified complemented                                                                                                                                                                                             | This study                                                                     |
| $\Delta$ lytA                        | Autolysin mutant                                                                                                                                                                                                                        | 1                                                                              |

**Supporting reference:**

1. Balachandran P, Hollingshead SK, Paton JC, Briles DE. The autolytic enzyme LytA of *Streptococcus pneumoniae* is not responsible for releasing pneumolysin. J Bacteriol. 2001;183(10):3108-16.
