# Supplementary material for: Deacetylation of sialic acid by esterases potentiates pneumococcal neuraminidase activity for mucin utilization, colonization and virulence
Source: PubMed Central journal article supplement (PMC5352144; doi:10.1371/journal.ppat.1006263), 2017-03-03
Supplement: ppat.1006263.s006.pdf [file ppat.1006263.s006.pdf]

| <b>Plasmids/phenotype</b>           | <b>Aim of use</b>                         | <b>Source</b>                      |
|-------------------------------------|-------------------------------------------|------------------------------------|
| pR412/spectinomycin<br>resistance   | Mariner mutagenesis                       | [1]                                |
| pCEP/ Kanamycin<br>resistance       | SOEing mutagenesis and<br>complementation | [2]                                |
| pLEICS-01/ Ampicillin<br>resistance | Proteins expression                       | PROTEX, University of<br>Leicester |

### **Supporting references:**

1. Martin B, Prudhomme M, Alloing G, Granadel C, Claverys JP. Cross-regulation of competence pheromone production and export in the early control of transformation in *Streptococcus pneumoniae*. Mol Microbiol. 2000;38(4):867-78.
2. Guiral S, Henard V, Laaberki MH, Granadel C, Prudhomme M, Martin B, et al. Construction and evaluation of a chromosomal expression platform (CEP) for ectopic, maltose-driven gene expression in *Streptococcus pneumoniae*. Microbiology. 2006;152(Pt 2):343-9.
